# Supplementary material for: Inhibition of Tumor Growth by Dietary Indole-3-Carbinol in a Prostate Cancer Xenograft Model May Be Associated with Disrupted Gut Microbial Interactions
Source: PubMed Central journal article supplement (PMC6413210; doi:10.3390/nu11020467), 2019-02-22
Supplement: nutrients-11-00467-s001.pdf [file nutrients-11-00467-s001.pdf]

**Table S1.** Microbial diversity of cecal samples in mice fed with or without in mice.

| Diversity Indices  | Control        | Indol-3-carbinol | P value |
|--------------------|----------------|------------------|---------|
| <b>Chao1</b>       | 307±19.27      | 335.3±18.91      | 0.95    |
| <b>PDwholetree</b> | 15.64±0.61     | 16.92±0.5703     | 0.85    |
| <b>Shannon</b>     | 4.133±0.1206   | 4.254±0.1332     | 0.79    |
| <b>Simpson</b>     | 0.8782±0.01083 | 0.8869±0.01269   | 0.66    |

**Table S2.** The topological properties of microbial co-occurrence networks.

| Group                             | Control (C) | I3C (I)    |
|-----------------------------------|-------------|------------|
| <sup>a</sup> No. of original OUTs | 238         | 208        |
| Similarity thresholds             | 0.80        | 0.79       |
| <sup>b</sup> Network size         | 156         | 180        |
| Avg. path                         | 3.821       | 4.100      |
| Avg. clustering coefficient       | 0.241       | 0.246      |
| Modularity (No. of modules)       | 0.674 (15)  | 0.667 (15) |

<sup>a</sup> The number of OTUs was originally used for network construction by the RMT-based network method. <sup>b</sup> The number of OTUs (i.e., nodes) in a network.

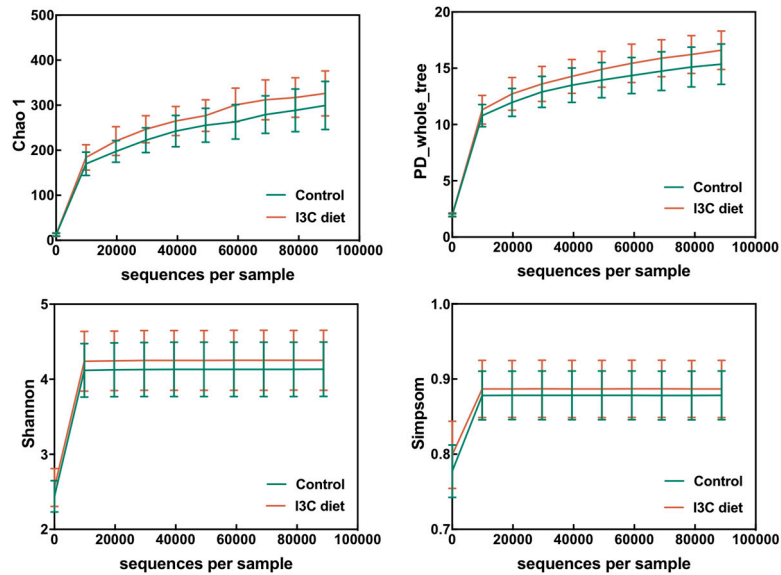

**Figure S1.** Rarefaction curves of cecal samples in mice fed with or without I3C.
